# Supplementary material
Source: publisher figshare collection journal article supplement (https://acs.figshare.com/ndownloader/files/7445335)
Supplement: Supplementary file 1 [file 7445335]

#=======================================================================
data_global
#=======================================================================

_audit_creation_method                   'Jana2006 Version : 25/10/2015'


# 1. PROCESSING SUMMARY (IUCr Office Use Only)

_journal_date_recd_electronic            ?
_journal_date_to_coeditor                ?
_journal_date_from_coeditor              ?
_journal_date_accepted                   ?
_journal_date_printers_first             ?
_journal_date_printers_final             ?
_journal_date_proofs_out                 ?
_journal_date_proofs_in                  ?
_journal_coeditor_name                   ?
_journal_coeditor_code                   ?
_journal_coeditor_notes
; ?
;
_journal_techeditor_code                 ?
_journal_paper_category                  ?
_journal_techeditor_notes
; ?
;
_journal_coden_ASTM                      ?
_journal_name_full                       'Inorganic Chemistry'
_journal_year                            ?
_journal_volume                          ?
_journal_issue                           ?
_journal_page_first                      ?
_journal_page_last                       ?
_journal_suppl_publ_number               ?
_journal_suppl_publ_pages                ?

#=======================================================================

# 2. SUBMISSION DETAILS

_publ_contact_author_name                'Dr. Oliver Janka'
_publ_contact_author_address     
;Institut f\"ur Anorganische und Analytische Chemie
Corrensstrasse 30
48149 M\"unster
;
_publ_contact_author_email       ocjanka@uni-muenster.de
_publ_contact_author_phone       '0049 251 83-36047'
_publ_contact_author_fax         '0049 251 83-36002'

_publ_requested_journal                  'Inorg. Chem.'
_publ_requested_category                 ?

_publ_contact_letter
; ?
;

#=======================================================================

# 3. TITLE AND AUTHOR LIST

_publ_section_title
; ?
;
_publ_section_title_footnote
; ?
;
loop_
 _publ_author_name
 _publ_author_address
      'Frank Stegemann, BSc.'
;      Institut f\"ur Anorganische und Analytische Chemie
       Westf\"alische Wilhelms-Universit\"at M\"unster
       Corrensstrasse 28/30
       48149 M\"unster
       Bundesrepublik Deutschland
;
      'Christopher Benndorf, MSc.'
;      Institut f\"ur Anorganische und Analytische Chemie
       Institut f\"ur Physikalische Chemie
       Westf\"alische Wilhelms-Universit\"at M\"unster
       Corrensstrasse 28/30
       48149 M\"unster
       Bundesrepublik Deutschland
;
      'Yuemei Zhang'
;      Department of Chemistry
       University of California, Riverside
       501 Box Springs Rd
       Riverside, CA, 92521
       United States of America
;
      'Dr. Manfred Bartsch'
;      Physikalisches Institut
       Westf\"alische Wilhelms-Universit\"at M\"unster
       Wilhelm-Klemm-Strasse 10
       48149 M\"unster
       Bundesrepublik Deutschland
;
      'Prof. Dr. Helmut Zacharias'
;      Physikalisches Institut
       Westf\"alische Wilhelms-Universit\"at M\"unster
       Wilhelm-Klemm-Strasse 10
       48149 M\"unster
       Bundesrepublik Deutschland
;
      'Prof. Dr. Boniface P. T. Fokwa'
;      Department of Chemistry
       University of California, Riverside
       501 Box Springs Rd
       Riverside, CA, 92521
       United States of America
;
      'Prof. Dr. Hellmut Eckert'
;      Institut f\"ur Physikalische Chemie
       Westf\"alische Wilhelms-Universit\"at M\"unster
       Corrensstrasse 28/30
       48149 M\"unster
       Bundesrepublik Deutschland
;
      'Dr. Oliver Janka'
;      Institut f\"ur Anorganische und Analytische Chemie
       Westf\"alische Wilhelms-Universit\"at M\"unster
       Corrensstrasse 28/30
       48149 M\"unster
       Bundesrepublik Deutschland
;
#=======================================================================

# 4. TEXT

_publ_section_synopsis
; ?
;
_publ_section_abstract
; ?
;
_publ_section_comment
; ?
;
_publ_section_introduction
; ?
;
_publ_section_experimental
; ?
;
_publ_section_exptl_prep
; ?
;
_publ_section_exptl_refinement
; ?
;
_publ_section_exptl_solution
; ?
;
_publ_section_discussion
; ?
;
_publ_section_acknowledgements
; ?
;
_publ_section_references
;
Petricek, V., Dusek, M. & Palatinus L. (2014). Z. Kristallogr. 229(5), 345-352.

Palatinus L. & Chapuis G. (2007). J. Appl. Cryst. 40, 786-790.

# enable this reference if Diamond ver. 2 was used for visualization
#Brandenburg, K. (1999). DIAMOND. Version. 2.1c.
#Crystal Impact GbR, Bonn, Germany.

# enable this reference if Diamond ver. 3 was used for visualization
#Brandenburg, K. & Putz, H. (2005). DIAMOND Version 3.
#Crystal Impact GbR, Postfach 1251, D-53002 Bonn, Germany.

# enable this reference if SIR97 was used for solving of the structure
#Altomare, A., Burla, M. C., Camalli, M., Cascarano, G., Giacovazzo, C.,
#Guagliardi, A., Moliterni, A. G. G., Polidori, G., Spagna, R. (1997).
#SIR97. A Package for Crystal Structure Solution by Direct Methods
#and Refinement, Bari, Rome, Italy.

# use this reference if SIR2002 was used for solving of the structure
#Burla, M.C., Camalli, M., Carrozzini, B., Cascarano, G., Giacovazzo, C.,
#Polidori, G., Spagna, R.
#SIR2002: the program, J. Appl. Cryst, (2003). 36, 1103


# use this reference if SIR2011 was used for solving of the structure
#Burla, M.C., Caliandro, R., Camalli, M., Carrozzini, B., Cascarano,
#G.L., Giacovazzo, C., Mallamo. M., Mazzone, A., Polidori, G., Spagna, R.
#SIR2011: a new package for crystal structure determination and refinement,
#J.Appl.Cryst. (2012) 45, 357-361

# enable this reference if bond valences were calculated
#Brown, I. D. (1996). J. Appl. Cryst. 29, 479-480.

# enable this reference if Xshape wase used for crystal shape refinement
#Stoe & Cie (1998). X-SHAPE. Stoe & Cie, Darmstadt, Germany.


# enable this reference if Flack coefficient was refined
#Flack, H. D. (1983). Acta Cryst. A39, 876-881.
;
_publ_section_figure_captions
; ?
;
_publ_section_table_legends
; ?
;

#=======================================================================
data_I
#=======================================================================

# 5. CHEMICAL DATA

_chemical_name_systematic
; ?
;
_chemical_name_common                    ?
_chemical_formula_moiety                 ?
_chemical_formula_structural             ?
_chemical_formula_analytical             ?
_chemical_formula_iupac                  ?
_chemical_formula_sum                    'Al1.54 Au2.46 Na2'
_chemical_formula_weight                 571.2
_chemical_melting_point                  ?
_chemical_compound_source                ?
_chemical_absolute_configuration         ?

#=======================================================================

# 6. CRYSTAL DATA

_symmetry_cell_setting                   cubic
_symmetry_space_group_name_H-M           'P 41 3 2'
_symmetry_space_group_name_Hall          'P 4bd;2ab;3'
_symmetry_Int_Tables_number              213

loop_
 _space_group_symop_id
 _space_group_symop_operation_xyz
 1   x,y,z
 2   -x+1/2,-y,z+1/2
 3   -x,y+1/2,-z+1/2
 4   x+1/2,-y+1/2,-z
 5   z,x,y
 6   z+1/2,-x+1/2,-y
 7   -z+1/2,-x,y+1/2
 8   -z,x+1/2,-y+1/2
 9   y,z,x
 10  -y,z+1/2,-x+1/2
 11  y+1/2,-z+1/2,-x
 12  -y+1/2,-z,x+1/2
 13  y+3/4,x+1/4,-z+1/4
 14  -y+3/4,-x+3/4,-z+3/4
 15  y+1/4,-x+1/4,z+3/4
 16  -y+1/4,x+3/4,z+1/4
 17  x+3/4,z+1/4,-y+1/4
 18  -x+1/4,z+3/4,y+1/4
 19  -x+3/4,-z+3/4,-y+3/4
 20  x+1/4,-z+1/4,y+3/4
 21  z+3/4,y+1/4,-x+1/4
 22  z+1/4,-y+1/4,x+3/4
 23  -z+1/4,y+3/4,x+1/4
 24  -z+3/4,-y+3/4,-x+3/4

_cell_length_a                           7.7133(3)
_cell_length_b                           7.7133(3)
_cell_length_c                           7.7133(3)
_cell_angle_alpha                        90
_cell_angle_beta                         90
_cell_angle_gamma                        90
_cell_volume                             458.90(3)

loop_
 _twin_individual_id
 _twin_individual_mass_fraction_refined
 _twin_individual_twin_matrix_11
 _twin_individual_twin_matrix_12
 _twin_individual_twin_matrix_13
 _twin_individual_twin_matrix_21
 _twin_individual_twin_matrix_22
 _twin_individual_twin_matrix_23
 _twin_individual_twin_matrix_31
 _twin_individual_twin_matrix_32
 _twin_individual_twin_matrix_33
1 0.86(4)
1 0 0
0 1 0
0 0 1
2 0.14(4)
-1 0 0
0 -1 0
0 0 -1

_cell_formula_units_Z                    4

_cell_measurement_reflns_used            19194
_cell_measurement_theta_min              3.73
_cell_measurement_theta_max              33.6
_cell_measurement_temperature            293
_cell_special_details
; ?
;

_exptl_crystal_density_diffrn            8.2802
_exptl_crystal_density_meas              ?
_exptl_crystal_density_method            ?
_exptl_crystal_F_000                     944

_exptl_absorpt_coefficient_mu            78.775
_exptl_crystal_description               block
_exptl_crystal_size_max                  0.080
_exptl_crystal_size_mid                  0.060
_exptl_crystal_size_min                  0.040
_exptl_crystal_size_rad                  ?
_exptl_crystal_colour                    silver
_exptl_absorpt_correction_type           Gaussian
_exptl_absorpt_process_details
 'Jana2006'
_exptl_absorpt_correction_T_min          0.002
_exptl_absorpt_correction_T_max          0.039
loop_
 _exptl_crystal_face_index_h
 _exptl_crystal_face_index_k
 _exptl_crystal_face_index_l
 _exptl_crystal_face_perp_dist
 ? ? ? ?

#=======================================================================

# 7. EXPERIMENTAL DATA

_exptl_special_details                   ?

_diffrn_ambient_temperature              293
_diffrn_source                           ?
_diffrn_source_power                     ?
_diffrn_source_voltage                   ?
_diffrn_source_current                   ?
_diffrn_radiation_type                   'Mo K\a'
_diffrn_radiation_source                 'X-ray tube'
_diffrn_radiation_wavelength             0.71073
_diffrn_radiation_monochromator          graphite
_diffrn_measurement_device               'four-circle diffractometer'
_diffrn_measurement_device_type          'IPDS Stoe'
_diffrn_detector                         ?
_diffrn_detector_area_resol_mean         ?
_diffrn_measurement_method               '??integration method??'
_diffrn_measurement_specimen_support     ?

_diffrn_reflns_number                    19641
_diffrn_reflns_theta_min                 3.74
_diffrn_reflns_theta_max                 33.3
_diffrn_reflns_theta_full                33.3
_diffrn_measured_fraction_theta_max      1
_diffrn_measured_fraction_theta_full     1
_diffrn_reflns_av_R_equivalents          0.074
_diffrn_reflns_av_unetI/netI             0.0041
_diffrn_reflns_limit_h_min               -11
_diffrn_reflns_limit_h_max               11
_diffrn_reflns_limit_k_min               -11
_diffrn_reflns_limit_k_max               11
_diffrn_reflns_limit_l_min               -11
_diffrn_reflns_limit_l_max               11
_diffrn_reflns_reduction_process         ?

_diffrn_standards_number                 ?
_diffrn_standards_interval_count         ?
_diffrn_standards_interval_time          ?
_diffrn_standards_decay_%                ?
loop_
_diffrn_standard_refln_index_h
_diffrn_standard_refln_index_k
_diffrn_standard_refln_index_l
  ? ? ?

_diffrn_radiation_probe                  X-ray

#=======================================================================

# 8. REFINEMENT DATA

_refine_special_details
; ?
;

_reflns_number_total                     304
_reflns_number_gt                        297
_reflns_threshold_expression             'I>3\s(I)'

_refine_ls_structure_factor_coef         Fsqd
_refine_ls_R_factor_gt                   0.0218
_refine_ls_wR_factor_gt                  0.0460
_refine_ls_R_factor_all                  0.0224
_refine_ls_wR_factor_ref                 0.0462
_refine_ls_goodness_of_fit_ref           1.92
_refine_ls_goodness_of_fit_gt            1.94
_refine_ls_restrained_S_gt               ?
_refine_ls_restrained_S_all              ?
_refine_ls_number_reflns                 304
_refine_ls_number_parameters             14
_refine_ls_number_restraints             0
_refine_ls_number_constraints            5
_refine_ls_weighting_scheme              sigma
_refine_ls_weighting_details             'w=1/(\s^2^(I)+0.0004I^2^)'
_refine_ls_hydrogen_treatment            ?
_refine_ls_shift/su_max                  0.0002
_refine_ls_shift/su_mean                 0.0001
_refine_diff_density_max                 1.73
_refine_diff_density_min                 -1.93
_refine_ls_extinction_method
 'B-C type 1 Gaussian isotropic (Becker & Coppens, 1974)'
_refine_ls_extinction_coef               80(17)
_refine_ls_abs_structure_details
;  90 of Friedel pairs used in the refinement
;
_refine_ls_abs_structure_Flack            0.14(4)
_refine_ls_abs_structure_Rogers          ?

loop_
 _atom_type_symbol
 _atom_type_scat_dispersion_real
 _atom_type_scat_dispersion_imag
 _atom_type_scat_source
 Al   0.0645  0.0514
 'International Tables Vol C tables 4.2.6.8 and 6.1.1.1'
 Au  -2.0133  8.8022
 'International Tables Vol C tables 4.2.6.8 and 6.1.1.1'
 Na   0.0362  0.0249
 'International Tables Vol C tables 4.2.6.8 and 6.1.1.1'

_computing_data_collection               ?
_computing_cell_refinement               ?
_computing_data_reduction                ?
_computing_structure_solution            ?
_computing_structure_refinement          ?
_computing_molecular_graphics            ?
_computing_publication_material          ?

loop_
 _restr_distance_atom_site_label_1
 _restr_distance_site_symmetry_1
 _restr_distance_atom_site_label_2
 _restr_distance_site_symmetry_2
 _restr_distance_target
 _restr_distance_target_weight_param
 ? ? ? ? ? ?

loop_
 _restr_angle_atom_site_label_1
 _restr_angle_site_symmetry_1
 _restr_angle_atom_site_label_2
 _restr_angle_site_symmetry_2
 _restr_angle_atom_site_label_3
 _restr_angle_site_symmetry_3
 _restr_angle_target
 _restr_angle_target_weight_param
 ? ? ? ? ? ? ? ?

loop_
 _restr_torsion_atom_site_label_1
 _restr_torsion_site_symmetry_1
 _restr_torsion_atom_site_label_2
 _restr_torsion_site_symmetry_2
 _restr_torsion_atom_site_label_3
 _restr_torsion_site_symmetry_3
 _restr_torsion_atom_site_label_4
 _restr_torsion_site_symmetry_4
 _restr_torsion_angle_target
 _restr_torsion_weight_param
 ? ? ? ? ? ? ? ? ? ?

loop_
 _restr_equal_distance_atom_site_label_1
 _restr_equal_distance_site_symmetry_1
 _restr_equal_distance_atom_site_label_2
 _restr_equal_distance_site_symmetry_2
 _restr_equal_distance_class_class_id
 _restr_equal_distance_class_target_weight_param
 ? ? ? ? ? ?

loop_
 _restr_equal_angle_atom_site_label_1
 _restr_equal_angle_site_symmetry_1
 _restr_equal_angle_atom_site_label_2
 _restr_equal_angle_site_symmetry_2
 _restr_equal_angle_atom_site_label_3
 _restr_equal_angle_site_symmetry_3
 _restr_equal_angle_class_class_id
 _restr_equal_angle_class_target_weight_param
 ? ? ? ? ? ? ? ?

loop_
 _restr_equal_torsion_atom_site_label_1
 _restr_equal_torsion_site_symmetry_1
 _restr_equal_torsion_atom_site_label_2
 _restr_equal_torsion_site_symmetry_2
 _restr_equal_torsion_atom_site_label_3
 _restr_equal_torsion_site_symmetry_3
 _restr_equal_torsion_atom_site_label_4
 _restr_equal_torsion_site_symmetry_4
 _restr_equal_torsion_class_class_id
 _restr_equal_torsion_class_target_weight_param
 ? ? ? ? ? ? ? ? ? ?


#=======================================================================

# 9. ATOMIC COORDINATES AND DISPLACEMENT PARAMETERS

loop_
 _atom_site_label
 _atom_site_type_symbol
 _atom_site_fract_x
 _atom_site_fract_y
 _atom_site_fract_z
 _atom_site_adp_type
 _atom_site_U_iso_or_equiv
 _atom_site_site_symmetry_multiplicity
 _atom_site_occupancy
 _atom_site_calc_flag
 _atom_site_refinement_flags
 _atom_site_disorder_assembly
 _atom_site_disorder_group
  Na Na 0.0170(4) 0.0170(4) 0.0170(4) Uani 0.0370(8) 8 1 d . . .
  Au1 Au 0.375 0.85070(3) 0.89930(3) Uani 0.02404(8) 12 0.82(2) d . . .
  Al1 Al 0.375 0.85070(3) 0.89930(3) Uani 0.02404(8) 12 0.18(2) d . . .
  Al2 Al 0.375 0.375 0.375 Uani 0.0128(5) 4 1 d . . .

loop_
 _atom_site_aniso_label
 _atom_site_aniso_type_symbol
 _atom_site_aniso_U_11
 _atom_site_aniso_U_22
 _atom_site_aniso_U_33
 _atom_site_aniso_U_12
 _atom_site_aniso_U_13
 _atom_site_aniso_U_23
 Na Na 0.0370(14) 0.0370(14) 0.0370(14) 0.0016(11) 0.0016(11) 0.0016(11)
 Au1 Au 0.02372(16) 0.02421(14) 0.02421(14) -0.00157(7) -0.00157(7) -0.00224(9)
 Al1 Al 0.02372(16) 0.02421(14) 0.02421(14) -0.00157(7) -0.00157(7) -0.00224(9)
 Al2 Al 0.0128(8) 0.0128(8) 0.0128(8) -0.0014(5) -0.0014(5) -0.0014(5)

loop_
 _jana_atom_site_ADP_C_label
 _jana_atom_site_ADP_C_type_symbol
 _jana_atom_site_ADP_C_111
 _jana_atom_site_ADP_C_112
 _jana_atom_site_ADP_C_113
 _jana_atom_site_ADP_C_122
 _jana_atom_site_ADP_C_123
 _jana_atom_site_ADP_C_133
 _jana_atom_site_ADP_C_222
 _jana_atom_site_ADP_C_223
 _jana_atom_site_ADP_C_233
 _jana_atom_site_ADP_C_333
 ? ? ? ? ? ? ? ? ? ? ? ?

loop_
 _jana_atom_site_ADP_D_label
 _jana_atom_site_ADP_D_type_symbol
 _jana_atom_site_ADP_D_1111
 _jana_atom_site_ADP_D_1112
 _jana_atom_site_ADP_D_1113
 _jana_atom_site_ADP_D_1122
 _jana_atom_site_ADP_D_1123
 _jana_atom_site_ADP_D_1133
 _jana_atom_site_ADP_D_1222
 _jana_atom_site_ADP_D_1223
 _jana_atom_site_ADP_D_1233
 _jana_atom_site_ADP_D_1333
 _jana_atom_site_ADP_D_2222
 _jana_atom_site_ADP_D_2223
 _jana_atom_site_ADP_D_2233
 _jana_atom_site_ADP_D_2333
 _jana_atom_site_ADP_D_3333
 ? ? ? ? ? ? ? ? ? ? ? ? ? ? ? ? ?

loop_
 _jana_atom_site_ADP_E_label
 _jana_atom_site_ADP_E_type_symbol
 _jana_atom_site_ADP_E_11111
 _jana_atom_site_ADP_E_11112
 _jana_atom_site_ADP_E_11113
 _jana_atom_site_ADP_E_11122
 _jana_atom_site_ADP_E_11123
 _jana_atom_site_ADP_E_11133
 _jana_atom_site_ADP_E_11222
 _jana_atom_site_ADP_E_11223
 _jana_atom_site_ADP_E_11233
 _jana_atom_site_ADP_E_11333
 _jana_atom_site_ADP_E_12222
 _jana_atom_site_ADP_E_12223
 _jana_atom_site_ADP_E_12233
 _jana_atom_site_ADP_E_12333
 _jana_atom_site_ADP_E_13333
 _jana_atom_site_ADP_E_22222
 _jana_atom_site_ADP_E_22223
 _jana_atom_site_ADP_E_22233
 _jana_atom_site_ADP_E_22333
 _jana_atom_site_ADP_E_23333
 _jana_atom_site_ADP_E_33333
 ? ? ? ? ? ? ? ? ? ? ? ? ? ? ? ? ? ? ? ? ? ? ?

loop_
 _jana_atom_site_ADP_F_label
 _jana_atom_site_ADP_F_type_symbol
 _jana_atom_site_ADP_F_111111
 _jana_atom_site_ADP_F_111112
 _jana_atom_site_ADP_F_111113
 _jana_atom_site_ADP_F_111122
 _jana_atom_site_ADP_F_111123
 _jana_atom_site_ADP_F_111133
 _jana_atom_site_ADP_F_111222
 _jana_atom_site_ADP_F_111223
 _jana_atom_site_ADP_F_111233
 _jana_atom_site_ADP_F_111333
 _jana_atom_site_ADP_F_112222
 _jana_atom_site_ADP_F_112223
 _jana_atom_site_ADP_F_112233
 _jana_atom_site_ADP_F_112333
 _jana_atom_site_ADP_F_113333
 _jana_atom_site_ADP_F_122222
 _jana_atom_site_ADP_F_122223
 _jana_atom_site_ADP_F_122233
 _jana_atom_site_ADP_F_122333
 _jana_atom_site_ADP_F_123333
 _jana_atom_site_ADP_F_133333
 _jana_atom_site_ADP_F_222222
 _jana_atom_site_ADP_F_222223
 _jana_atom_site_ADP_F_222233
 _jana_atom_site_ADP_F_222333
 _jana_atom_site_ADP_F_223333
 _jana_atom_site_ADP_F_233333
 _jana_atom_site_ADP_F_333333
 ? ? ? ? ? ? ? ? ? ? ? ? ? ? ? ? ? ? ? ? ? ? ? ? ? ? ? ? ? ?


#=======================================================================

# 10. MOLECULAR GEOMETRY


loop_
 _geom_bond_atom_site_label_1
 _geom_bond_atom_site_label_2
 _geom_bond_site_symmetry_1
 _geom_bond_site_symmetry_2
 _geom_bond_distance
 _geom_bond_publ_flag
  Na Na . 13_455 3.196(5) ?
  Na Na . 14_444 3.793(5) ?
  Na Na . 15_554 3.196(5) ?
  Na Na . 16_545 3.196(5) ?
  Na Au1 . 1_544 3.177(3) ?
  Na Au1 . 2_564 3.230(3) ?
  Na Au1 . 4_456 3.108(3) ?
  Na Au1 . 5_454 3.177(3) ?
  Na Au1 . 6_456 3.230(3) ?
  Na Au1 . 8_645 3.108(3) ?
  Na Au1 . 9_445 3.177(3) ?
  Na Au1 . 10_645 3.230(3) ?
  Na Au1 . 12_564 3.108(3) ?
  Na Al1 . 1_544 3.177(3) ?
  Na Al1 . 2_564 3.230(3) ?
  Na Al1 . 4_456 3.108(3) ?
  Na Al1 . 5_454 3.177(3) ?
  Na Al1 . 6_456 3.230(3) ?
  Na Al1 . 8_645 3.108(3) ?
  Na Al1 . 9_445 3.177(3) ?
  Na Al1 . 10_645 3.230(3) ?
  Na Al1 . 12_564 3.108(3) ?
  Na Al2 . 2_554 3.322(3) ?
  Na Al2 . 3_545 3.322(3) ?
  Na Al2 . 4_455 3.322(3) ?
  Au1 Au1 . 6_467 2.8688(3) ?
  Au1 Au1 . 8_656 2.8688(3) ?
  Au1 Au1 . 11_466 2.8688(3) ?
  Au1 Au1 . 12_675 2.8688(3) ?
  Au1 Al1 . 6_467 2.8688(3) ?
  Au1 Al1 . 8_656 2.8688(3) ?
  Au1 Al1 . 11_466 2.8688(3) ?
  Au1 Al1 . 12_675 2.8688(3) ?
  Au1 Al2 . 2_565 2.6047(2) ?
  Au1 Al2 . 3_656 2.6047(2) ?
  Al1 Al1 . 6_467 2.8688(3) ?
  Al1 Al1 . 8_656 2.8688(3) ?
  Al1 Al1 . 11_466 2.8688(3) ?
  Al1 Al1 . 12_675 2.8688(3) ?
  Al1 Al2 . 2_565 2.6047(2) ?
  Al1 Al2 . 3_656 2.6047(2) ?

loop_
 _geom_angle_atom_site_label_1
 _geom_angle_atom_site_label_2
 _geom_angle_atom_site_label_3
 _geom_angle_site_symmetry_1
 _geom_angle_site_symmetry_2
 _geom_angle_site_symmetry_3
 _geom_angle
 _geom_angle_publ_flag
  Na Na Na 13_455 . 14_444 107.52(12) ?
  Na Na Na 13_455 . 15_554 111.35(13) ?
  Na Na Na 13_455 . 16_545 111.35(13) ?
  Na Na Au1 13_455 . 1_544 156.48(14) ?
  Na Na Au1 13_455 . 2_564 59.26(9) ?
  Na Na Au1 13_455 . 4_456 103.27(12) ?
  Na Na Au1 13_455 . 5_454 60.90(9) ?
  Na Na Au1 13_455 . 6_456 103.32(11) ?
  Na Na Au1 13_455 . 8_645 144.47(13) ?
  Na Na Au1 13_455 . 9_445 58.37(9) ?
  Na Na Au1 13_455 . 10_645 60.35(9) ?
  Na Na Au1 13_455 . 12_564 60.51(9) ?
  Na Na Al1 13_455 . 1_544 156.48(14) ?
  Na Na Al1 13_455 . 2_564 59.26(9) ?
  Na Na Al1 13_455 . 4_456 103.27(12) ?
  Na Na Al1 13_455 . 5_454 60.90(9) ?
  Na Na Al1 13_455 . 6_456 103.32(11) ?
  Na Na Al1 13_455 . 8_645 144.47(13) ?
  Na Na Al1 13_455 . 9_445 58.37(9) ?
  Na Na Al1 13_455 . 10_645 60.35(9) ?
  Na Na Al1 13_455 . 12_564 60.51(9) ?
  Na Na Al2 13_455 . 2_554 150.74(13) ?
  Na Na Al2 13_455 . 3_545 61.24(9) ?
  Na Na Al2 13_455 . 4_455 97.14(11) ?
  Na Na Na 14_444 . 15_554 107.52(12) ?
  Na Na Na 14_444 . 16_545 107.52(12) ?
  Na Na Au1 14_444 . 1_544 95.96(10) ?
  Na Na Au1 14_444 . 2_564 149.15(12) ?
  Na Na Au1 14_444 . 4_456 52.39(7) ?
  Na Na Au1 14_444 . 5_454 95.96(10) ?
  Na Na Au1 14_444 . 6_456 149.15(12) ?
  Na Na Au1 14_444 . 8_645 52.39(7) ?
  Na Na Au1 14_444 . 9_445 95.96(10) ?
  Na Na Au1 14_444 . 10_645 149.15(12) ?
  Na Na Au1 14_444 . 12_564 52.39(7) ?
  Na Na Al1 14_444 . 1_544 95.96(10) ?
  Na Na Al1 14_444 . 2_564 149.15(12) ?
  Na Na Al1 14_444 . 4_456 52.39(7) ?
  Na Na Al1 14_444 . 5_454 95.96(10) ?
  Na Na Al1 14_444 . 6_456 149.15(12) ?
  Na Na Al1 14_444 . 8_645 52.39(7) ?
  Na Na Al1 14_444 . 9_445 95.96(10) ?
  Na Na Al1 14_444 . 10_645 149.15(12) ?
  Na Na Al1 14_444 . 12_564 52.39(7) ?
  Na Na Al2 14_444 . 2_554 55.18(7) ?
  Na Na Al2 14_444 . 3_545 55.18(7) ?
  Na Na Al2 14_444 . 4_455 55.18(7) ?
  Na Na Na 15_554 . 16_545 111.35(13) ?
  Na Na Au1 15_554 . 1_544 60.90(9) ?
  Na Na Au1 15_554 . 2_564 103.32(11) ?
  Na Na Au1 15_554 . 4_456 144.47(13) ?
  Na Na Au1 15_554 . 5_454 58.37(9) ?
  Na Na Au1 15_554 . 6_456 60.35(9) ?
  Na Na Au1 15_554 . 8_645 60.51(9) ?
  Na Na Au1 15_554 . 9_445 156.48(14) ?
  Na Na Au1 15_554 . 10_645 59.26(9) ?
  Na Na Au1 15_554 . 12_564 103.27(12) ?
  Na Na Al1 15_554 . 1_544 60.90(9) ?
  Na Na Al1 15_554 . 2_564 103.32(11) ?
  Na Na Al1 15_554 . 4_456 144.47(13) ?
  Na Na Al1 15_554 . 5_454 58.37(9) ?
  Na Na Al1 15_554 . 6_456 60.35(9) ?
  Na Na Al1 15_554 . 8_645 60.51(9) ?
  Na Na Al1 15_554 . 9_445 156.48(14) ?
  Na Na Al1 15_554 . 10_645 59.26(9) ?
  Na Na Al1 15_554 . 12_564 103.27(12) ?
  Na Na Al2 15_554 . 2_554 97.14(11) ?
  Na Na Al2 15_554 . 3_545 150.74(13) ?
  Na Na Al2 15_554 . 4_455 61.24(9) ?
  Na Na Au1 16_545 . 1_544 58.37(9) ?
  Na Na Au1 16_545 . 2_564 60.35(9) ?
  Na Na Au1 16_545 . 4_456 60.51(9) ?
  Na Na Au1 16_545 . 5_454 156.48(14) ?
  Na Na Au1 16_545 . 6_456 59.26(9) ?
  Na Na Au1 16_545 . 8_645 103.27(12) ?
  Na Na Au1 16_545 . 9_445 60.90(9) ?
  Na Na Au1 16_545 . 10_645 103.32(11) ?
  Na Na Au1 16_545 . 12_564 144.47(13) ?
  Na Na Al1 16_545 . 1_544 58.37(9) ?
  Na Na Al1 16_545 . 2_564 60.35(9) ?
  Na Na Al1 16_545 . 4_456 60.51(9) ?
  Na Na Al1 16_545 . 5_454 156.48(14) ?
  Na Na Al1 16_545 . 6_456 59.26(9) ?
  Na Na Al1 16_545 . 8_645 103.27(12) ?
  Na Na Al1 16_545 . 9_445 60.90(9) ?
  Na Na Al1 16_545 . 10_645 103.32(11) ?
  Na Na Al1 16_545 . 12_564 144.47(13) ?
  Na Na Al2 16_545 . 2_554 61.24(9) ?
  Na Na Al2 16_545 . 3_545 97.14(11) ?
  Na Na Al2 16_545 . 4_455 150.74(13) ?
  Au1 Na Au1 1_544 . 2_564 99.45(9) ?
  Au1 Na Au1 1_544 . 4_456 89.85(9) ?
  Au1 Na Au1 1_544 . 5_454 118.93(11) ?
  Au1 Na Au1 1_544 . 6_456 53.19(6) ?
  Au1 Na Au1 1_544 . 8_645 54.30(6) ?
  Au1 Na Au1 1_544 . 9_445 118.93(11) ?
  Au1 Na Au1 1_544 . 10_645 99.64(9) ?
  Au1 Na Au1 1_544 . 12_564 140.93(12) ?
  Au1 Na Al1 1_544 . 1_544 0.0(5) ?
  Au1 Na Al1 1_544 . 2_564 99.45(9) ?
  Au1 Na Al1 1_544 . 4_456 89.85(9) ?
  Au1 Na Al1 1_544 . 5_454 118.93(11) ?
  Au1 Na Al1 1_544 . 6_456 53.19(6) ?
  Au1 Na Al1 1_544 . 8_645 54.30(6) ?
  Au1 Na Al1 1_544 . 9_445 118.93(11) ?
  Au1 Na Al1 1_544 . 10_645 99.64(9) ?
  Au1 Na Al1 1_544 . 12_564 140.93(12) ?
  Au1 Na Al2 1_544 . 2_554 47.19(5) ?
  Au1 Na Al2 1_544 . 3_545 136.86(11) ?
  Au1 Na Al2 1_544 . 4_455 97.34(9) ?
  Au1 Na Au1 2_564 . 4_456 100.92(10) ?
  Au1 Na Au1 2_564 . 5_454 99.64(9) ?
  Au1 Na Au1 2_564 . 6_456 52.73(5) ?
  Au1 Na Au1 2_564 . 8_645 152.98(12) ?
  Au1 Na Au1 2_564 . 9_445 53.19(6) ?
  Au1 Na Au1 2_564 . 10_645 52.73(5) ?
  Au1 Na Au1 2_564 . 12_564 119.43(11) ?
  Au1 Na Al1 2_564 . 1_544 99.45(9) ?
  Au1 Na Al1 2_564 . 2_564 0.0(5) ?
  Au1 Na Al1 2_564 . 4_456 100.92(10) ?
  Au1 Na Al1 2_564 . 5_454 99.64(9) ?
  Au1 Na Al1 2_564 . 6_456 52.73(5) ?
  Au1 Na Al1 2_564 . 8_645 152.98(12) ?
  Au1 Na Al1 2_564 . 9_445 53.19(6) ?
  Au1 Na Al1 2_564 . 10_645 52.73(5) ?
  Au1 Na Al1 2_564 . 12_564 119.43(11) ?
  Au1 Na Al2 2_564 . 2_554 121.59(11) ?
  Au1 Na Al2 2_564 . 3_545 96.31(9) ?
  Au1 Na Al2 2_564 . 4_455 146.80(12) ?
  Au1 Na Au1 4_456 . 5_454 140.93(12) ?
  Au1 Na Au1 4_456 . 6_456 119.43(11) ?
  Au1 Na Au1 4_456 . 8_645 86.64(9) ?
  Au1 Na Au1 4_456 . 9_445 54.30(6) ?
  Au1 Na Au1 4_456 . 10_645 152.98(12) ?
  Au1 Na Au1 4_456 . 12_564 86.64(9) ?
  Au1 Na Al1 4_456 . 1_544 89.85(9) ?
  Au1 Na Al1 4_456 . 2_564 100.92(10) ?
  Au1 Na Al1 4_456 . 4_456 0.0(5) ?
  Au1 Na Al1 4_456 . 5_454 140.93(12) ?
  Au1 Na Al1 4_456 . 6_456 119.43(11) ?
  Au1 Na Al1 4_456 . 8_645 86.64(9) ?
  Au1 Na Al1 4_456 . 9_445 54.30(6) ?
  Au1 Na Al1 4_456 . 10_645 152.98(12) ?
  Au1 Na Al1 4_456 . 12_564 86.64(9) ?
  Au1 Na Al2 4_456 . 2_554 47.65(5) ?
  Au1 Na Al2 4_456 . 3_545 47.65(5) ?
  Au1 Na Al2 4_456 . 4_455 107.57(10) ?
  Au1 Na Au1 5_454 . 6_456 99.45(9) ?
  Au1 Na Au1 5_454 . 8_645 89.85(9) ?
  Au1 Na Au1 5_454 . 9_445 118.93(11) ?
  Au1 Na Au1 5_454 . 10_645 53.19(6) ?
  Au1 Na Au1 5_454 . 12_564 54.30(6) ?
  Au1 Na Al1 5_454 . 1_544 118.93(11) ?
  Au1 Na Al1 5_454 . 2_564 99.64(9) ?
  Au1 Na Al1 5_454 . 4_456 140.93(12) ?
  Au1 Na Al1 5_454 . 5_454 0.0(5) ?
  Au1 Na Al1 5_454 . 6_456 99.45(9) ?
  Au1 Na Al1 5_454 . 8_645 89.85(9) ?
  Au1 Na Al1 5_454 . 9_445 118.93(11) ?
  Au1 Na Al1 5_454 . 10_645 53.19(6) ?
  Au1 Na Al1 5_454 . 12_564 54.30(6) ?
  Au1 Na Al2 5_454 . 2_554 136.86(11) ?
  Au1 Na Al2 5_454 . 3_545 97.34(9) ?
  Au1 Na Al2 5_454 . 4_455 47.19(5) ?
  Au1 Na Au1 6_456 . 8_645 100.92(10) ?
  Au1 Na Au1 6_456 . 9_445 99.64(9) ?
  Au1 Na Au1 6_456 . 10_645 52.73(5) ?
  Au1 Na Au1 6_456 . 12_564 152.98(12) ?
  Au1 Na Al1 6_456 . 1_544 53.19(6) ?
  Au1 Na Al1 6_456 . 2_564 52.73(5) ?
  Au1 Na Al1 6_456 . 4_456 119.43(11) ?
  Au1 Na Al1 6_456 . 5_454 99.45(9) ?
  Au1 Na Al1 6_456 . 6_456 0.0(5) ?
  Au1 Na Al1 6_456 . 8_645 100.92(10) ?
  Au1 Na Al1 6_456 . 9_445 99.64(9) ?
  Au1 Na Al1 6_456 . 10_645 52.73(5) ?
  Au1 Na Al1 6_456 . 12_564 152.98(12) ?
  Au1 Na Al2 6_456 . 2_554 96.31(9) ?
  Au1 Na Al2 6_456 . 3_545 146.80(12) ?
  Au1 Na Al2 6_456 . 4_455 121.59(11) ?
  Au1 Na Au1 8_645 . 9_445 140.93(12) ?
  Au1 Na Au1 8_645 . 10_645 119.43(11) ?
  Au1 Na Au1 8_645 . 12_564 86.64(9) ?
  Au1 Na Al1 8_645 . 1_544 54.30(6) ?
  Au1 Na Al1 8_645 . 2_564 152.98(12) ?
  Au1 Na Al1 8_645 . 4_456 86.64(9) ?
  Au1 Na Al1 8_645 . 5_454 89.85(9) ?
  Au1 Na Al1 8_645 . 6_456 100.92(10) ?
  Au1 Na Al1 8_645 . 8_645 0.0(5) ?
  Au1 Na Al1 8_645 . 9_445 140.93(12) ?
  Au1 Na Al1 8_645 . 10_645 119.43(11) ?
  Au1 Na Al1 8_645 . 12_564 86.64(9) ?
  Au1 Na Al2 8_645 . 2_554 47.65(5) ?
  Au1 Na Al2 8_645 . 3_545 107.57(10) ?
  Au1 Na Al2 8_645 . 4_455 47.65(5) ?
  Au1 Na Au1 9_445 . 10_645 99.45(9) ?
  Au1 Na Au1 9_445 . 12_564 89.85(9) ?
  Au1 Na Al1 9_445 . 1_544 118.93(11) ?
  Au1 Na Al1 9_445 . 2_564 53.19(6) ?
  Au1 Na Al1 9_445 . 4_456 54.30(6) ?
  Au1 Na Al1 9_445 . 5_454 118.93(11) ?
  Au1 Na Al1 9_445 . 6_456 99.64(9) ?
  Au1 Na Al1 9_445 . 8_645 140.93(12) ?
  Au1 Na Al1 9_445 . 9_445 0.0(5) ?
  Au1 Na Al1 9_445 . 10_645 99.45(9) ?
  Au1 Na Al1 9_445 . 12_564 89.85(9) ?
  Au1 Na Al2 9_445 . 2_554 97.34(9) ?
  Au1 Na Al2 9_445 . 3_545 47.19(5) ?
  Au1 Na Al2 9_445 . 4_455 136.86(11) ?
  Au1 Na Au1 10_645 . 12_564 100.92(10) ?
  Au1 Na Al1 10_645 . 1_544 99.64(9) ?
  Au1 Na Al1 10_645 . 2_564 52.73(5) ?
  Au1 Na Al1 10_645 . 4_456 152.98(12) ?
  Au1 Na Al1 10_645 . 5_454 53.19(6) ?
  Au1 Na Al1 10_645 . 6_456 52.73(5) ?
  Au1 Na Al1 10_645 . 8_645 119.43(11) ?
  Au1 Na Al1 10_645 . 9_445 99.45(9) ?
  Au1 Na Al1 10_645 . 10_645 0.0(5) ?
  Au1 Na Al1 10_645 . 12_564 100.92(10) ?
  Au1 Na Al2 10_645 . 2_554 146.80(12) ?
  Au1 Na Al2 10_645 . 3_545 121.59(11) ?
  Au1 Na Al2 10_645 . 4_455 96.31(9) ?
  Au1 Na Al1 12_564 . 1_544 140.93(12) ?
  Au1 Na Al1 12_564 . 2_564 119.43(11) ?
  Au1 Na Al1 12_564 . 4_456 86.64(9) ?
  Au1 Na Al1 12_564 . 5_454 54.30(6) ?
  Au1 Na Al1 12_564 . 6_456 152.98(12) ?
  Au1 Na Al1 12_564 . 8_645 86.64(9) ?
  Au1 Na Al1 12_564 . 9_445 89.85(9) ?
  Au1 Na Al1 12_564 . 10_645 100.92(10) ?
  Au1 Na Al1 12_564 . 12_564 0.0(5) ?
  Au1 Na Al2 12_564 . 2_554 107.57(10) ?
  Au1 Na Al2 12_564 . 3_545 47.65(5) ?
  Au1 Na Al2 12_564 . 4_455 47.65(5) ?
  Al1 Na Al1 1_544 . 2_564 99.45(9) ?
  Al1 Na Al1 1_544 . 4_456 89.85(9) ?
  Al1 Na Al1 1_544 . 5_454 118.93(11) ?
  Al1 Na Al1 1_544 . 6_456 53.19(6) ?
  Al1 Na Al1 1_544 . 8_645 54.30(6) ?
  Al1 Na Al1 1_544 . 9_445 118.93(11) ?
  Al1 Na Al1 1_544 . 10_645 99.64(9) ?
  Al1 Na Al1 1_544 . 12_564 140.93(12) ?
  Al1 Na Al2 1_544 . 2_554 47.19(5) ?
  Al1 Na Al2 1_544 . 3_545 136.86(11) ?
  Al1 Na Al2 1_544 . 4_455 97.34(9) ?
  Al1 Na Al1 2_564 . 4_456 100.92(10) ?
  Al1 Na Al1 2_564 . 5_454 99.64(9) ?
  Al1 Na Al1 2_564 . 6_456 52.73(5) ?
  Al1 Na Al1 2_564 . 8_645 152.98(12) ?
  Al1 Na Al1 2_564 . 9_445 53.19(6) ?
  Al1 Na Al1 2_564 . 10_645 52.73(5) ?
  Al1 Na Al1 2_564 . 12_564 119.43(11) ?
  Al1 Na Al2 2_564 . 2_554 121.59(11) ?
  Al1 Na Al2 2_564 . 3_545 96.31(9) ?
  Al1 Na Al2 2_564 . 4_455 146.80(12) ?
  Al1 Na Al1 4_456 . 5_454 140.93(12) ?
  Al1 Na Al1 4_456 . 6_456 119.43(11) ?
  Al1 Na Al1 4_456 . 8_645 86.64(9) ?
  Al1 Na Al1 4_456 . 9_445 54.30(6) ?
  Al1 Na Al1 4_456 . 10_645 152.98(12) ?
  Al1 Na Al1 4_456 . 12_564 86.64(9) ?
  Al1 Na Al2 4_456 . 2_554 47.65(5) ?
  Al1 Na Al2 4_456 . 3_545 47.65(5) ?
  Al1 Na Al2 4_456 . 4_455 107.57(10) ?
  Al1 Na Al1 5_454 . 6_456 99.45(9) ?
  Al1 Na Al1 5_454 . 8_645 89.85(9) ?
  Al1 Na Al1 5_454 . 9_445 118.93(11) ?
  Al1 Na Al1 5_454 . 10_645 53.19(6) ?
  Al1 Na Al1 5_454 . 12_564 54.30(6) ?
  Al1 Na Al2 5_454 . 2_554 136.86(11) ?
  Al1 Na Al2 5_454 . 3_545 97.34(9) ?
  Al1 Na Al2 5_454 . 4_455 47.19(5) ?
  Al1 Na Al1 6_456 . 8_645 100.92(10) ?
  Al1 Na Al1 6_456 . 9_445 99.64(9) ?
  Al1 Na Al1 6_456 . 10_645 52.73(5) ?
  Al1 Na Al1 6_456 . 12_564 152.98(12) ?
  Al1 Na Al2 6_456 . 2_554 96.31(9) ?
  Al1 Na Al2 6_456 . 3_545 146.80(12) ?
  Al1 Na Al2 6_456 . 4_455 121.59(11) ?
  Al1 Na Al1 8_645 . 9_445 140.93(12) ?
  Al1 Na Al1 8_645 . 10_645 119.43(11) ?
  Al1 Na Al1 8_645 . 12_564 86.64(9) ?
  Al1 Na Al2 8_645 . 2_554 47.65(5) ?
  Al1 Na Al2 8_645 . 3_545 107.57(10) ?
  Al1 Na Al2 8_645 . 4_455 47.65(5) ?
  Al1 Na Al1 9_445 . 10_645 99.45(9) ?
  Al1 Na Al1 9_445 . 12_564 89.85(9) ?
  Al1 Na Al2 9_445 . 2_554 97.34(9) ?
  Al1 Na Al2 9_445 . 3_545 47.19(5) ?
  Al1 Na Al2 9_445 . 4_455 136.86(11) ?
  Al1 Na Al1 10_645 . 12_564 100.92(10) ?
  Al1 Na Al2 10_645 . 2_554 146.80(12) ?
  Al1 Na Al2 10_645 . 3_545 121.59(11) ?
  Al1 Na Al2 10_645 . 4_455 96.31(9) ?
  Al1 Na Al2 12_564 . 2_554 107.57(10) ?
  Al1 Na Al2 12_564 . 3_545 47.65(5) ?
  Al1 Na Al2 12_564 . 4_455 47.65(5) ?
  Al2 Na Al2 2_554 . 3_545 90.63(8) ?
  Al2 Na Al2 2_554 . 4_455 90.63(8) ?
  Al2 Na Al2 3_545 . 4_455 90.63(8) ?
  Na Au1 Na 1_566 . 2_565 110.95(9) ?
  Na Au1 Na 1_566 . 4_556 127.97(9) ?
  Na Au1 Na 1_566 . 14_555 170.43(9) ?
  Na Au1 Na 1_566 . 15_565 59.84(9) ?
  Na Au1 Na 1_566 . 16_556 61.12(9) ?
  Na Au1 Au1 1_566 . 6_467 64.35(6) ?
  Na Au1 Au1 1_566 . 8_656 61.61(6) ?
  Na Au1 Au1 1_566 . 11_466 115.16(6) ?
  Na Au1 Au1 1_566 . 12_675 112.85(6) ?
  Na Au1 Al1 1_566 . 6_467 64.35(6) ?
  Na Au1 Al1 1_566 . 8_656 61.61(6) ?
  Na Au1 Al1 1_566 . 11_466 115.16(6) ?
  Na Au1 Al1 1_566 . 12_675 112.85(6) ?
  Na Au1 Al2 1_566 . 2_565 69.32(6) ?
  Na Au1 Al2 1_566 . 3_656 115.06(6) ?
  Na Au1 Na 2_565 . 4_556 112.78(9) ?
  Na Au1 Na 2_565 . 14_555 59.84(9) ?
  Na Au1 Na 2_565 . 15_565 59.30(9) ?
  Na Au1 Na 2_565 . 16_556 171.77(9) ?
  Na Au1 Au1 2_565 . 6_467 111.33(6) ?
  Na Au1 Au1 2_565 . 8_656 63.64(6) ?
  Na Au1 Au1 2_565 . 11_466 63.64(6) ?
  Na Au1 Au1 2_565 . 12_675 62.46(6) ?
  Na Au1 Al1 2_565 . 6_467 111.33(6) ?
  Na Au1 Al1 2_565 . 8_656 63.64(6) ?
  Na Au1 Al1 2_565 . 11_466 63.64(6) ?
  Na Au1 Al1 2_565 . 12_675 62.46(6) ?
  Na Au1 Al2 2_565 . 2_565 109.66(6) ?
  Na Au1 Al2 2_565 . 3_656 113.36(6) ?
  Na Au1 Na 4_556 . 14_555 61.12(9) ?
  Na Au1 Na 4_556 . 15_565 171.77(9) ?
  Na Au1 Na 4_556 . 16_556 75.22(9) ?
  Na Au1 Au1 4_556 . 6_467 120.68(6) ?
  Na Au1 Au1 4_556 . 8_656 117.33(6) ?
  Na Au1 Au1 4_556 . 11_466 64.08(6) ?
  Na Au1 Au1 4_556 . 12_675 111.54(6) ?
  Na Au1 Al1 4_556 . 6_467 120.68(6) ?
  Na Au1 Al1 4_556 . 8_656 117.33(6) ?
  Na Au1 Al1 4_556 . 11_466 64.08(6) ?
  Na Au1 Al1 4_556 . 12_675 111.54(6) ?
  Na Au1 Al2 4_556 . 2_565 70.48(6) ?
  Na Au1 Al2 4_556 . 3_656 70.48(6) ?
  Na Au1 Na 14_555 . 15_565 110.95(9) ?
  Na Au1 Na 14_555 . 16_556 127.97(9) ?
  Na Au1 Au1 14_555 . 6_467 115.16(6) ?
  Na Au1 Au1 14_555 . 8_656 112.85(6) ?
  Na Au1 Au1 14_555 . 11_466 64.35(6) ?
  Na Au1 Au1 14_555 . 12_675 61.61(6) ?
  Na Au1 Al1 14_555 . 6_467 115.16(6) ?
  Na Au1 Al1 14_555 . 8_656 112.85(6) ?
  Na Au1 Al1 14_555 . 11_466 64.35(6) ?
  Na Au1 Al1 14_555 . 12_675 61.61(6) ?
  Na Au1 Al2 14_555 . 2_565 115.06(6) ?
  Na Au1 Al2 14_555 . 3_656 69.32(6) ?
  Na Au1 Na 15_565 . 16_556 112.78(9) ?
  Na Au1 Au1 15_565 . 6_467 63.64(6) ?
  Na Au1 Au1 15_565 . 8_656 62.46(6) ?
  Na Au1 Au1 15_565 . 11_466 111.33(6) ?
  Na Au1 Au1 15_565 . 12_675 63.64(6) ?
  Na Au1 Al1 15_565 . 6_467 63.64(6) ?
  Na Au1 Al1 15_565 . 8_656 62.46(6) ?
  Na Au1 Al1 15_565 . 11_466 111.33(6) ?
  Na Au1 Al1 15_565 . 12_675 63.64(6) ?
  Na Au1 Al2 15_565 . 2_565 113.36(6) ?
  Na Au1 Al2 15_565 . 3_656 109.66(6) ?
  Na Au1 Au1 16_556 . 6_467 64.08(6) ?
  Na Au1 Au1 16_556 . 8_656 111.54(6) ?
  Na Au1 Au1 16_556 . 11_466 120.68(6) ?
  Na Au1 Au1 16_556 . 12_675 117.33(6) ?
  Na Au1 Al1 16_556 . 6_467 64.08(6) ?
  Na Au1 Al1 16_556 . 8_656 111.54(6) ?
  Na Au1 Al1 16_556 . 11_466 120.68(6) ?
  Na Au1 Al1 16_556 . 12_675 117.33(6) ?
  Na Au1 Al2 16_556 . 2_565 70.48(6) ?
  Na Au1 Al2 16_556 . 3_656 70.48(6) ?
  Au1 Au1 Au1 6_467 . 8_656 116.860(9) ?
  Au1 Au1 Au1 6_467 . 11_466 174.705(11) ?
  Au1 Au1 Au1 6_467 . 12_675 60.000(7) ?
  Au1 Au1 Al1 6_467 . 6_467 0.0(5) ?
  Au1 Au1 Al1 6_467 . 8_656 116.860(9) ?
  Au1 Au1 Al1 6_467 . 11_466 174.705(11) ?
  Au1 Au1 Al1 6_467 . 12_675 60.000(7) ?
  Au1 Au1 Al2 6_467 . 2_565 126.133(8) ?
  Au1 Au1 Al2 6_467 . 3_656 56.585(7) ?
  Au1 Au1 Au1 8_656 . 11_466 60.000(7) ?
  Au1 Au1 Au1 8_656 . 12_675 117.135(10) ?
  Au1 Au1 Al1 8_656 . 6_467 116.860(9) ?
  Au1 Au1 Al1 8_656 . 8_656 0.0(5) ?
  Au1 Au1 Al1 8_656 . 11_466 60.000(7) ?
  Au1 Au1 Al1 8_656 . 12_675 117.135(10) ?
  Au1 Au1 Al2 8_656 . 2_565 56.585(4) ?
  Au1 Au1 Al2 8_656 . 3_656 172.123(11) ?
  Au1 Au1 Au1 11_466 . 12_675 116.860(9) ?
  Au1 Au1 Al1 11_466 . 6_467 174.705(11) ?
  Au1 Au1 Al1 11_466 . 8_656 60.000(7) ?
  Au1 Au1 Al1 11_466 . 11_466 0.0(5) ?
  Au1 Au1 Al1 11_466 . 12_675 116.860(9) ?
  Au1 Au1 Al2 11_466 . 2_565 56.585(7) ?
  Au1 Au1 Al2 11_466 . 3_656 126.133(8) ?
  Au1 Au1 Al1 12_675 . 6_467 60.000(7) ?
  Au1 Au1 Al1 12_675 . 8_656 117.135(10) ?
  Au1 Au1 Al1 12_675 . 11_466 116.860(9) ?
  Au1 Au1 Al1 12_675 . 12_675 0.0(5) ?
  Au1 Au1 Al2 12_675 . 2_565 172.123(11) ?
  Au1 Au1 Al2 12_675 . 3_656 56.585(4) ?
  Al1 Au1 Al1 6_467 . 8_656 116.860(9) ?
  Al1 Au1 Al1 6_467 . 11_466 174.705(11) ?
  Al1 Au1 Al1 6_467 . 12_675 60.000(7) ?
  Al1 Au1 Al2 6_467 . 2_565 126.133(8) ?
  Al1 Au1 Al2 6_467 . 3_656 56.585(7) ?
  Al1 Au1 Al1 8_656 . 11_466 60.000(7) ?
  Al1 Au1 Al1 8_656 . 12_675 117.135(10) ?
  Al1 Au1 Al2 8_656 . 2_565 56.585(4) ?
  Al1 Au1 Al2 8_656 . 3_656 172.123(11) ?
  Al1 Au1 Al1 11_466 . 12_675 116.860(9) ?
  Al1 Au1 Al2 11_466 . 2_565 56.585(7) ?
  Al1 Au1 Al2 11_466 . 3_656 126.133(8) ?
  Al1 Au1 Al2 12_675 . 2_565 172.123(11) ?
  Al1 Au1 Al2 12_675 . 3_656 56.585(4) ?
  Al2 Au1 Al2 2_565 . 3_656 130.112(10) ?
  Na Al1 Na 1_566 . 2_565 110.95(9) ?
  Na Al1 Na 1_566 . 4_556 127.97(9) ?
  Na Al1 Na 1_566 . 14_555 170.43(9) ?
  Na Al1 Na 1_566 . 15_565 59.84(9) ?
  Na Al1 Na 1_566 . 16_556 61.12(9) ?
  Na Al1 Au1 1_566 . 6_467 64.35(6) ?
  Na Al1 Au1 1_566 . 8_656 61.61(6) ?
  Na Al1 Au1 1_566 . 11_466 115.16(6) ?
  Na Al1 Au1 1_566 . 12_675 112.85(6) ?
  Na Al1 Al1 1_566 . 6_467 64.35(6) ?
  Na Al1 Al1 1_566 . 8_656 61.61(6) ?
  Na Al1 Al1 1_566 . 11_466 115.16(6) ?
  Na Al1 Al1 1_566 . 12_675 112.85(6) ?
  Na Al1 Al2 1_566 . 2_565 69.32(6) ?
  Na Al1 Al2 1_566 . 3_656 115.06(6) ?
  Na Al1 Na 2_565 . 4_556 112.78(9) ?
  Na Al1 Na 2_565 . 14_555 59.84(9) ?
  Na Al1 Na 2_565 . 15_565 59.30(9) ?
  Na Al1 Na 2_565 . 16_556 171.77(9) ?
  Na Al1 Au1 2_565 . 6_467 111.33(6) ?
  Na Al1 Au1 2_565 . 8_656 63.64(6) ?
  Na Al1 Au1 2_565 . 11_466 63.64(6) ?
  Na Al1 Au1 2_565 . 12_675 62.46(6) ?
  Na Al1 Al1 2_565 . 6_467 111.33(6) ?
  Na Al1 Al1 2_565 . 8_656 63.64(6) ?
  Na Al1 Al1 2_565 . 11_466 63.64(6) ?
  Na Al1 Al1 2_565 . 12_675 62.46(6) ?
  Na Al1 Al2 2_565 . 2_565 109.66(6) ?
  Na Al1 Al2 2_565 . 3_656 113.36(6) ?
  Na Al1 Na 4_556 . 14_555 61.12(9) ?
  Na Al1 Na 4_556 . 15_565 171.77(9) ?
  Na Al1 Na 4_556 . 16_556 75.22(9) ?
  Na Al1 Au1 4_556 . 6_467 120.68(6) ?
  Na Al1 Au1 4_556 . 8_656 117.33(6) ?
  Na Al1 Au1 4_556 . 11_466 64.08(6) ?
  Na Al1 Au1 4_556 . 12_675 111.54(6) ?
  Na Al1 Al1 4_556 . 6_467 120.68(6) ?
  Na Al1 Al1 4_556 . 8_656 117.33(6) ?
  Na Al1 Al1 4_556 . 11_466 64.08(6) ?
  Na Al1 Al1 4_556 . 12_675 111.54(6) ?
  Na Al1 Al2 4_556 . 2_565 70.48(6) ?
  Na Al1 Al2 4_556 . 3_656 70.48(6) ?
  Na Al1 Na 14_555 . 15_565 110.95(9) ?
  Na Al1 Na 14_555 . 16_556 127.97(9) ?
  Na Al1 Au1 14_555 . 6_467 115.16(6) ?
  Na Al1 Au1 14_555 . 8_656 112.85(6) ?
  Na Al1 Au1 14_555 . 11_466 64.35(6) ?
  Na Al1 Au1 14_555 . 12_675 61.61(6) ?
  Na Al1 Al1 14_555 . 6_467 115.16(6) ?
  Na Al1 Al1 14_555 . 8_656 112.85(6) ?
  Na Al1 Al1 14_555 . 11_466 64.35(6) ?
  Na Al1 Al1 14_555 . 12_675 61.61(6) ?
  Na Al1 Al2 14_555 . 2_565 115.06(6) ?
  Na Al1 Al2 14_555 . 3_656 69.32(6) ?
  Na Al1 Na 15_565 . 16_556 112.78(9) ?
  Na Al1 Au1 15_565 . 6_467 63.64(6) ?
  Na Al1 Au1 15_565 . 8_656 62.46(6) ?
  Na Al1 Au1 15_565 . 11_466 111.33(6) ?
  Na Al1 Au1 15_565 . 12_675 63.64(6) ?
  Na Al1 Al1 15_565 . 6_467 63.64(6) ?
  Na Al1 Al1 15_565 . 8_656 62.46(6) ?
  Na Al1 Al1 15_565 . 11_466 111.33(6) ?
  Na Al1 Al1 15_565 . 12_675 63.64(6) ?
  Na Al1 Al2 15_565 . 2_565 113.36(6) ?
  Na Al1 Al2 15_565 . 3_656 109.66(6) ?
  Na Al1 Au1 16_556 . 6_467 64.08(6) ?
  Na Al1 Au1 16_556 . 8_656 111.54(6) ?
  Na Al1 Au1 16_556 . 11_466 120.68(6) ?
  Na Al1 Au1 16_556 . 12_675 117.33(6) ?
  Na Al1 Al1 16_556 . 6_467 64.08(6) ?
  Na Al1 Al1 16_556 . 8_656 111.54(6) ?
  Na Al1 Al1 16_556 . 11_466 120.68(6) ?
  Na Al1 Al1 16_556 . 12_675 117.33(6) ?
  Na Al1 Al2 16_556 . 2_565 70.48(6) ?
  Na Al1 Al2 16_556 . 3_656 70.48(6) ?
  Au1 Al1 Au1 6_467 . 8_656 116.860(9) ?
  Au1 Al1 Au1 6_467 . 11_466 174.705(11) ?
  Au1 Al1 Au1 6_467 . 12_675 60.000(7) ?
  Au1 Al1 Al1 6_467 . 6_467 0.0(5) ?
  Au1 Al1 Al1 6_467 . 8_656 116.860(9) ?
  Au1 Al1 Al1 6_467 . 11_466 174.705(11) ?
  Au1 Al1 Al1 6_467 . 12_675 60.000(7) ?
  Au1 Al1 Al2 6_467 . 2_565 126.133(8) ?
  Au1 Al1 Al2 6_467 . 3_656 56.585(7) ?
  Au1 Al1 Au1 8_656 . 11_466 60.000(7) ?
  Au1 Al1 Au1 8_656 . 12_675 117.135(10) ?
  Au1 Al1 Al1 8_656 . 6_467 116.860(9) ?
  Au1 Al1 Al1 8_656 . 8_656 0.0(5) ?
  Au1 Al1 Al1 8_656 . 11_466 60.000(7) ?
  Au1 Al1 Al1 8_656 . 12_675 117.135(10) ?
  Au1 Al1 Al2 8_656 . 2_565 56.585(4) ?
  Au1 Al1 Al2 8_656 . 3_656 172.123(11) ?
  Au1 Al1 Au1 11_466 . 12_675 116.860(9) ?
  Au1 Al1 Al1 11_466 . 6_467 174.705(11) ?
  Au1 Al1 Al1 11_466 . 8_656 60.000(7) ?
  Au1 Al1 Al1 11_466 . 11_466 0.0(5) ?
  Au1 Al1 Al1 11_466 . 12_675 116.860(9) ?
  Au1 Al1 Al2 11_466 . 2_565 56.585(7) ?
  Au1 Al1 Al2 11_466 . 3_656 126.133(8) ?
  Au1 Al1 Al1 12_675 . 6_467 60.000(7) ?
  Au1 Al1 Al1 12_675 . 8_656 117.135(10) ?
  Au1 Al1 Al1 12_675 . 11_466 116.860(9) ?
  Au1 Al1 Al1 12_675 . 12_675 0.0(5) ?
  Au1 Al1 Al2 12_675 . 2_565 172.123(11) ?
  Au1 Al1 Al2 12_675 . 3_656 56.585(4) ?
  Al1 Al1 Al1 6_467 . 8_656 116.860(9) ?
  Al1 Al1 Al1 6_467 . 11_466 174.705(11) ?
  Al1 Al1 Al1 6_467 . 12_675 60.000(7) ?
  Al1 Al1 Al2 6_467 . 2_565 126.133(8) ?
  Al1 Al1 Al2 6_467 . 3_656 56.585(7) ?
  Al1 Al1 Al1 8_656 . 11_466 60.000(7) ?
  Al1 Al1 Al1 8_656 . 12_675 117.135(10) ?
  Al1 Al1 Al2 8_656 . 2_565 56.585(4) ?
  Al1 Al1 Al2 8_656 . 3_656 172.123(11) ?
  Al1 Al1 Al1 11_466 . 12_675 116.860(9) ?
  Al1 Al1 Al2 11_466 . 2_565 56.585(7) ?
  Al1 Al1 Al2 11_466 . 3_656 126.133(8) ?
  Al1 Al1 Al2 12_675 . 2_565 172.123(11) ?
  Al1 Al1 Al2 12_675 . 3_656 56.585(4) ?
  Al2 Al1 Al2 2_565 . 3_656 130.112(10) ?
  Na Al2 Na 2_555 . 3_555 116.47(8) ?
  Na Al2 Na 2_555 . 4_555 116.47(8) ?
  Na Al2 Na 2_555 . 13_555 69.64(8) ?
  Na Al2 Na 2_555 . 15_555 57.51(8) ?
  Na Al2 Na 2_555 . 16_555 173.61(8) ?
  Na Al2 Au1 2_555 . 2_564 63.49(6) ?
  Na Al2 Au1 2_555 . 3_646 61.87(6) ?
  Na Al2 Au1 2_555 . 6_456 61.87(6) ?
  Na Al2 Au1 2_555 . 7_664 122.00(6) ?
  Na Al2 Au1 2_555 . 10_645 118.50(6) ?
  Na Al2 Au1 2_555 . 11_466 112.48(6) ?
  Na Al2 Al1 2_555 . 2_564 63.49(6) ?
  Na Al2 Al1 2_555 . 3_646 61.87(6) ?
  Na Al2 Al1 2_555 . 6_456 61.87(6) ?
  Na Al2 Al1 2_555 . 7_664 122.00(6) ?
  Na Al2 Al1 2_555 . 10_645 118.50(6) ?
  Na Al2 Al1 2_555 . 11_466 112.48(6) ?
  Na Al2 Na 3_555 . 4_555 116.47(8) ?
  Na Al2 Na 3_555 . 13_555 173.61(8) ?
  Na Al2 Na 3_555 . 15_555 69.64(8) ?
  Na Al2 Na 3_555 . 16_555 57.51(8) ?
  Na Al2 Au1 3_555 . 2_564 61.87(6) ?
  Na Al2 Au1 3_555 . 3_646 122.00(6) ?
  Na Al2 Au1 3_555 . 6_456 118.50(6) ?
  Na Al2 Au1 3_555 . 7_664 112.48(6) ?
  Na Al2 Au1 3_555 . 10_645 63.49(6) ?
  Na Al2 Au1 3_555 . 11_466 61.87(6) ?
  Na Al2 Al1 3_555 . 2_564 61.87(6) ?
  Na Al2 Al1 3_555 . 3_646 122.00(6) ?
  Na Al2 Al1 3_555 . 6_456 118.50(6) ?
  Na Al2 Al1 3_555 . 7_664 112.48(6) ?
  Na Al2 Al1 3_555 . 10_645 63.49(6) ?
  Na Al2 Al1 3_555 . 11_466 61.87(6) ?
  Na Al2 Na 4_555 . 13_555 57.51(8) ?
  Na Al2 Na 4_555 . 15_555 173.61(8) ?
  Na Al2 Na 4_555 . 16_555 69.64(8) ?
  Na Al2 Au1 4_555 . 2_564 118.50(6) ?
  Na Al2 Au1 4_555 . 3_646 112.48(6) ?
  Na Al2 Au1 4_555 . 6_456 63.49(6) ?
  Na Al2 Au1 4_555 . 7_664 61.87(6) ?
  Na Al2 Au1 4_555 . 10_645 61.87(6) ?
  Na Al2 Au1 4_555 . 11_466 122.00(6) ?
  Na Al2 Al1 4_555 . 2_564 118.50(6) ?
  Na Al2 Al1 4_555 . 3_646 112.48(6) ?
  Na Al2 Al1 4_555 . 6_456 63.49(6) ?
  Na Al2 Al1 4_555 . 7_664 61.87(6) ?
  Na Al2 Al1 4_555 . 10_645 61.87(6) ?
  Na Al2 Al1 4_555 . 11_466 122.00(6) ?
  Na Al2 Na 13_555 . 15_555 116.47(8) ?
  Na Al2 Na 13_555 . 16_555 116.47(8) ?
  Na Al2 Au1 13_555 . 2_564 122.00(6) ?
  Na Al2 Au1 13_555 . 3_646 61.87(6) ?
  Na Al2 Au1 13_555 . 6_456 61.87(6) ?
  Na Al2 Au1 13_555 . 7_664 63.49(6) ?
  Na Al2 Au1 13_555 . 10_645 112.48(6) ?
  Na Al2 Au1 13_555 . 11_466 118.50(6) ?
  Na Al2 Al1 13_555 . 2_564 122.00(6) ?
  Na Al2 Al1 13_555 . 3_646 61.87(6) ?
  Na Al2 Al1 13_555 . 6_456 61.87(6) ?
  Na Al2 Al1 13_555 . 7_664 63.49(6) ?
  Na Al2 Al1 13_555 . 10_645 112.48(6) ?
  Na Al2 Al1 13_555 . 11_466 118.50(6) ?
  Na Al2 Na 15_555 . 16_555 116.47(8) ?
  Na Al2 Au1 15_555 . 2_564 61.87(6) ?
  Na Al2 Au1 15_555 . 3_646 63.49(6) ?
  Na Al2 Au1 15_555 . 6_456 112.48(6) ?
  Na Al2 Au1 15_555 . 7_664 118.50(6) ?
  Na Al2 Au1 15_555 . 10_645 122.00(6) ?
  Na Al2 Au1 15_555 . 11_466 61.87(6) ?
  Na Al2 Al1 15_555 . 2_564 61.87(6) ?
  Na Al2 Al1 15_555 . 3_646 63.49(6) ?
  Na Al2 Al1 15_555 . 6_456 112.48(6) ?
  Na Al2 Al1 15_555 . 7_664 118.50(6) ?
  Na Al2 Al1 15_555 . 10_645 122.00(6) ?
  Na Al2 Al1 15_555 . 11_466 61.87(6) ?
  Na Al2 Au1 16_555 . 2_564 112.48(6) ?
  Na Al2 Au1 16_555 . 3_646 118.50(6) ?
  Na Al2 Au1 16_555 . 6_456 122.00(6) ?
  Na Al2 Au1 16_555 . 7_664 61.87(6) ?
  Na Al2 Au1 16_555 . 10_645 61.87(6) ?
  Na Al2 Au1 16_555 . 11_466 63.49(6) ?
  Na Al2 Al1 16_555 . 2_564 112.48(6) ?
  Na Al2 Al1 16_555 . 3_646 118.50(6) ?
  Na Al2 Al1 16_555 . 6_456 122.00(6) ?
  Na Al2 Al1 16_555 . 7_664 61.87(6) ?
  Na Al2 Al1 16_555 . 10_645 61.87(6) ?
  Na Al2 Al1 16_555 . 11_466 63.49(6) ?
  Au1 Al2 Au1 2_564 . 3_646 116.866(7) ?
  Au1 Al2 Au1 2_564 . 6_456 66.830(7) ?
  Au1 Al2 Au1 2_564 . 7_664 174.167(6) ?
  Au1 Al2 Au1 2_564 . 10_645 66.830(7) ?
  Au1 Al2 Au1 2_564 . 11_466 109.888(8) ?
  Au1 Al2 Al1 2_564 . 2_564 0.0(5) ?
  Au1 Al2 Al1 2_564 . 3_646 116.866(7) ?
  Au1 Al2 Al1 2_564 . 6_456 66.830(7) ?
  Au1 Al2 Al1 2_564 . 7_664 174.167(6) ?
  Au1 Al2 Al1 2_564 . 10_645 66.830(7) ?
  Au1 Al2 Al1 2_564 . 11_466 109.888(8) ?
  Au1 Al2 Au1 3_646 . 6_456 109.888(8) ?
  Au1 Al2 Au1 3_646 . 7_664 66.830(7) ?
  Au1 Al2 Au1 3_646 . 10_645 174.167(6) ?
  Au1 Al2 Au1 3_646 . 11_466 66.830(7) ?
  Au1 Al2 Al1 3_646 . 2_564 116.866(7) ?
  Au1 Al2 Al1 3_646 . 3_646 0.0(5) ?
  Au1 Al2 Al1 3_646 . 6_456 109.888(8) ?
  Au1 Al2 Al1 3_646 . 7_664 66.830(7) ?
  Au1 Al2 Al1 3_646 . 10_645 174.167(6) ?
  Au1 Al2 Al1 3_646 . 11_466 66.830(7) ?
  Au1 Al2 Au1 6_456 . 7_664 116.866(7) ?
  Au1 Al2 Au1 6_456 . 10_645 66.830(7) ?
  Au1 Al2 Au1 6_456 . 11_466 174.167(6) ?
  Au1 Al2 Al1 6_456 . 2_564 66.830(7) ?
  Au1 Al2 Al1 6_456 . 3_646 109.888(8) ?
  Au1 Al2 Al1 6_456 . 6_456 0.0(5) ?
  Au1 Al2 Al1 6_456 . 7_664 116.866(7) ?
  Au1 Al2 Al1 6_456 . 10_645 66.830(7) ?
  Au1 Al2 Al1 6_456 . 11_466 174.167(6) ?
  Au1 Al2 Au1 7_664 . 10_645 109.888(8) ?
  Au1 Al2 Au1 7_664 . 11_466 66.830(7) ?
  Au1 Al2 Al1 7_664 . 2_564 174.167(6) ?
  Au1 Al2 Al1 7_664 . 3_646 66.830(7) ?
  Au1 Al2 Al1 7_664 . 6_456 116.866(7) ?
  Au1 Al2 Al1 7_664 . 7_664 0.0(5) ?
  Au1 Al2 Al1 7_664 . 10_645 109.888(8) ?
  Au1 Al2 Al1 7_664 . 11_466 66.830(7) ?
  Au1 Al2 Au1 10_645 . 11_466 116.866(7) ?
  Au1 Al2 Al1 10_645 . 2_564 66.830(7) ?
  Au1 Al2 Al1 10_645 . 3_646 174.167(6) ?
  Au1 Al2 Al1 10_645 . 6_456 66.830(7) ?
  Au1 Al2 Al1 10_645 . 7_664 109.888(8) ?
  Au1 Al2 Al1 10_645 . 10_645 0.0(5) ?
  Au1 Al2 Al1 10_645 . 11_466 116.866(7) ?
  Au1 Al2 Al1 11_466 . 2_564 109.888(8) ?
  Au1 Al2 Al1 11_466 . 3_646 66.830(7) ?
  Au1 Al2 Al1 11_466 . 6_456 174.167(6) ?
  Au1 Al2 Al1 11_466 . 7_664 66.830(7) ?
  Au1 Al2 Al1 11_466 . 10_645 116.866(7) ?
  Au1 Al2 Al1 11_466 . 11_466 0.0(5) ?
  Al1 Al2 Al1 2_564 . 3_646 116.866(7) ?
  Al1 Al2 Al1 2_564 . 6_456 66.830(7) ?
  Al1 Al2 Al1 2_564 . 7_664 174.167(6) ?
  Al1 Al2 Al1 2_564 . 10_645 66.830(7) ?
  Al1 Al2 Al1 2_564 . 11_466 109.888(8) ?
  Al1 Al2 Al1 3_646 . 6_456 109.888(8) ?
  Al1 Al2 Al1 3_646 . 7_664 66.830(7) ?
  Al1 Al2 Al1 3_646 . 10_645 174.167(6) ?
  Al1 Al2 Al1 3_646 . 11_466 66.830(7) ?
  Al1 Al2 Al1 6_456 . 7_664 116.866(7) ?
  Al1 Al2 Al1 6_456 . 10_645 66.830(7) ?
  Al1 Al2 Al1 6_456 . 11_466 174.167(6) ?
  Al1 Al2 Al1 7_664 . 10_645 109.888(8) ?
  Al1 Al2 Al1 7_664 . 11_466 66.830(7) ?
  Al1 Al2 Al1 10_645 . 11_466 116.866(7) ?

loop_
 _geom_torsion_atom_site_label_1
 _geom_torsion_atom_site_label_2
 _geom_torsion_atom_site_label_3
 _geom_torsion_atom_site_label_4
 _geom_torsion_site_symmetry_1
 _geom_torsion_site_symmetry_2
 _geom_torsion_site_symmetry_3
 _geom_torsion_site_symmetry_4
 _geom_torsion
 _geom_torsion_publ_flag
 ? ? ? ? ? ? ? ? ? ?

loop_
 _geom_hbond_atom_site_label_D
 _geom_hbond_atom_site_label_H
 _geom_hbond_atom_site_label_A
 _geom_hbond_site_symmetry_D
 _geom_hbond_site_symmetry_H
 _geom_hbond_site_symmetry_A
 _geom_hbond_distance_DH
 _geom_hbond_distance_HA
 _geom_hbond_distance_DA
 _geom_hbond_angle_DHA
 _geom_hbond_publ_flag
 ? ? ? ? ? ? ? ? ? ? ?


#=======================================================================

# 11. STRUCTURE-FACTOR LIST

loop_
 _refln_index_h
 _refln_index_k
 _refln_index_l
 _refln_F_squared_calc
 _refln_F_squared_meas
 _refln_F_squared_sigma
 _refln_observed_status
   0   1   1   1002.26    863.73    230.90 o
   1   1   1  98045.40 118076.00    390.07 o
   0   1   2  15580.40  17299.30    118.21 o
   1   1   2  20597.90  23281.00    112.73 o
   0   2   2   1419.40   1735.33    111.13 o
   1   2   2  19808.80  22076.30     86.43 o
   2   2   2 322117.00 289200.00    315.90 o
   0   1   3  24920.70  27219.20     83.73 o
   1   1   3 117279.00 119778.00    115.08 o
   0   2   3   7938.94   8048.38     60.02 o
   1   2   3    406.92    401.50     54.10 o
  -1   2   3    461.81    532.47     56.95 o
   2   2   3   4828.17   5511.56     59.91 o
   0   3   3  34686.60  35617.50    101.08 o
   1   3   3  41155.30  45245.50     69.46 o
   2   3   3   7211.38   8052.63     51.38 o
   3   3   3  28066.10  28855.40     94.82 o
   0   0   4 216677.00 228521.00    305.91 o
   0   1   4  14651.90  16890.80     63.03 o
   1   1   4    183.04    327.42     51.25 o
   0   2   4     92.01    182.21     45.55 o
   1   2   4   8952.41   9076.34     51.42 o
  -1   2   4   9156.63   9452.42     54.28 o
   2   2   4   2627.08   2627.27     48.44 o
   0   3   4  23540.00  23403.20     54.53 o
   1   3   4   7817.50   8036.91     42.81 o
  -1   3   4   7452.84   7564.46     48.53 o
   2   3   4   5717.65   5745.78     48.48 o
  -2   3   4   5190.54   5153.89     42.78 o
   3   3   4  16868.40  16436.00     45.77 o
   0   4   4 140472.00 124927.00    106.85 o
   1   4   4  18472.10  18214.20     42.94 o
   2   4   4   2578.75   2652.38     37.04 o
   3   4   4  21432.70  20851.00     42.94 o
   4   4   4  53232.70  52038.80     86.50 o
   0   1   5   6451.31   6964.46     51.36 o
   1   1   5  38489.20  40263.00     60.55 o
   0   2   5   1159.76   1107.85     39.87 o
   1   2   5  26361.20  26211.30     51.68 o
  -1   2   5  26792.40  27047.30     51.67 o
   2   2   5   8409.72   8701.85     42.81 o
   0   3   5   1516.53   1455.40     34.18 o
   1   3   5  27593.30  28767.10     45.91 o
  -1   3   5  27629.40  28379.30     48.78 o
   2   3   5  11477.50  11418.20     39.97 o
  -2   3   5  10826.50  10458.60     39.98 o
   3   3   5  31465.50  31680.70     45.92 o
   0   4   5   3285.28   3222.61     31.34 o
   1   4   5   3385.09   3593.03     34.19 o
  -1   4   5   3347.29   3396.47     31.34 o
   2   4   5    577.11    617.84     31.32 o
  -2   4   5    454.98    455.57     28.47 o
   3   4   5    973.27    945.34     25.63 o
  -3   4   5    840.80    851.42     25.63 o
   4   4   5   1479.13   1455.23     25.63 o
   0   5   5  10417.10  10179.80     48.52 o
   1   5   5   3976.46   4245.80     31.34 o
   2   5   5  15408.10  15001.30     31.43 o
   3   5   5  13443.50  13073.80     31.41 o
   4   5   5   9018.29   8559.27     28.52 o
   5   5   5     96.14     85.41     39.86 <
   0   1   6   7725.88   7751.65     42.80 o
   1   1   6   1158.51   1247.33     37.02 o
   0   2   6   2920.85   2886.14     37.04 o
   1   2   6  20986.90  20831.90     42.95 o
  -1   2   6  21494.60  21449.10     42.94 o
   2   2   6  71104.70  69339.30     52.17 o
   0   3   6    831.68    831.46     28.47 o
   1   3   6    934.56    931.17     28.48 o
  -1   3   6   1016.69   1002.33     28.48 o
   2   3   6   8133.10   8151.87     31.38 o
  -2   3   6   7988.63   7827.08     34.23 o
   3   3   6   5496.47   5478.53     28.50 o
   0   4   6    227.10    253.38     25.62 o
   1   4   6   3675.66   3576.23     28.50 o
  -1   4   6   4071.09   3894.89     31.34 o
   2   4   6    702.75    768.75     25.62 o
  -2   4   6    569.33    575.16     25.63 o
   3   4   6   2088.66   1959.51     25.63 o
  -3   4   6   2059.13   1976.62     22.79 o
   4   4   6   1016.48   1005.15     22.78 o
   0   5   6   2150.67   2022.21     25.63 o
   1   5   6   4683.27   4477.20     25.65 o
  -1   5   6   4966.36   4793.13     25.65 o
   2   5   6  16365.80  15535.00     28.57 o
  -2   5   6  16709.10  16030.40     28.56 o
   3   5   6   3362.90   3179.20     22.79 o
  -3   5   6   3301.06   3139.37     22.79 o
   4   5   6   1521.40   1457.99     19.93 o
  -4   5   6   1409.00   1344.12     19.93 o
   5   5   6   3085.29   2968.12     19.94 o
   0   6   6   2417.14   2327.00     31.33 o
   1   6   6  12765.40  12529.00     28.54 o
   2   6   6  18712.60  18245.50     28.57 o
   3   6   6   3004.93   2959.57     19.94 o
   4   6   6   2936.55   2851.24     19.94 o
   5   6   6   8615.19   8259.84     22.81 o
   6   6   6   6052.23   6027.34     37.05 o
   0   1   7  16299.40  16424.10     37.15 o
   1   1   7  13754.20  14563.00     37.13 o
   0   2   7    448.84    444.16     28.47 o
   1   2   7   1102.09   1076.40     25.63 o
  -1   2   7   1148.30   1221.61     28.48 o
   2   2   7    252.79    264.77     25.62 o
   0   3   7  18515.60  17590.60     31.44 o
   1   3   7   8959.97   8973.89     28.52 o
  -1   3   7   9051.61   9107.70     28.52 o
   2   3   7   7866.44   7701.95     28.52 o
  -2   3   7   7735.08   7417.09     28.52 o
   3   3   7    678.64    734.60     22.78 o
   0   4   7   7301.23   7056.65     25.66 o
   1   4   7  10912.90  10414.20     28.53 o
  -1   4   7  10868.00  10311.60     28.53 o
   2   4   7     50.36     76.87     22.78 o
  -2   4   7     71.33    116.72     22.78 o
   3   4   7   7514.83   7289.75     22.81 o
  -3   4   7   7309.95   6965.13     22.81 o
   4   4   7   8168.61   7803.80     22.81 o
   0   5   7   4996.78   4815.89     22.80 o
   1   5   7  11017.80  10713.20     25.68 o
  -1   5   7  11177.20  10852.50     25.68 o
   2   5   7    791.13    831.41     19.93 o
  -2   5   7    759.74    740.30     19.93 o
   3   5   7   6516.35   6219.32     22.80 o
  -3   5   7   6477.86   6236.49     22.80 o
   4   5   7   3949.99   3794.57     19.94 o
  -4   5   7   3754.51   3586.78     19.94 o
   5   5   7   4277.30   4113.95     19.94 o
   0   6   7    229.29    204.98     19.93 o
   1   6   7   1160.81   1158.90     19.93 o
  -1   6   7   1057.33   1019.40     19.93 o
   2   6   7    436.53    449.84     19.93 o
  -2   6   7    438.34    481.16     19.93 o
   3   6   7   3190.58   3025.06     19.94 o
  -3   6   7   3149.69   3033.64     19.94 o
   4   6   7    493.78    495.39     17.08 o
  -4   6   7    385.86    435.61     17.08 o
   5   6   7   1051.50   1053.51     17.08 o
  -5   6   7    956.07   1005.13     17.08 o
   6   6   7     28.11     51.24     17.08 <
   0   7   7   3978.96   3931.42     28.49 o
   1   7   7    605.01    603.60     19.93 o
   2   7   7   5768.23   5556.93     19.95 o
   3   7   7     67.25     71.17     17.08 o
   4   7   7   2239.36   2207.16     17.09 o
   5   7   7   1771.11   1728.56     17.09 o
   6   7   7   2274.33   2335.31     17.09 o
   0   0   8  32188.60  32746.20     77.38 o
   0   1   8  13057.60  12916.90     31.40 o
   1   1   8   1548.48   1574.82     25.63 o
   0   2   8    313.74    335.95     25.62 o
   1   2   8   2051.48   1990.68     25.63 o
  -1   2   8   1824.47   1805.68     25.63 o
   2   2   8      3.54     22.77     22.77 <
   0   3   8  15455.60  14948.40     28.55 o
   1   3   8    624.58    654.85     22.78 o
  -1   3   8    539.94    563.75     22.78 o
   2   3   8   3052.50   2908.43     22.79 o
  -2   3   8   3162.64   3136.23     22.79 o
   3   3   8    308.23    333.10     19.93 o
   0   4   8  13722.00  13509.00     25.69 o
   1   4   8   6547.06   6322.11     22.80 o
  -1   4   8   6553.21   6310.70     22.80 o
   2   4   8   1858.73   1834.02     19.93 o
  -2   4   8   1861.20   1859.65     19.93 o
   3   4   8  11481.90  10940.40     22.82 o
  -3   4   8  11489.70  11108.70     22.82 o
   4   4   8   9268.75   8973.70     19.96 o
   0   5   8   1677.54   1634.60     19.93 o
   1   5   8   2532.66   2477.87     22.78 o
  -1   5   8   2460.38   2312.72     19.94 o
   2   5   8     86.84    113.88     19.93 o
  -2   5   8    138.79    139.50     17.08 o
   3   5   8    875.00    899.77     17.08 o
  -3   5   8    950.98    965.24     17.08 o
   4   5   8   1145.70   1141.82     17.08 o
  -4   5   8   1132.41   1127.59     17.08 o
   5   5   8   2414.87   2349.63     17.09 o
   0   6   8    948.61    936.78     19.93 o
   1   6   8   1206.04   1156.05     19.93 o
  -1   6   8   1111.41   1130.45     19.93 o
   2   6   8    718.22    751.66     19.93 o
  -2   6   8    677.85    703.27     19.93 o
   3   6   8   1172.89   1116.24     17.09 o
  -3   6   8   1362.93   1383.85     19.93 o
   4   6   8   1378.02   1349.74     17.09 o
  -4   6   8   1395.54   1409.53     17.09 o
   5   6   8    526.89    535.25     17.08 o
  -5   6   8    433.89    447.00     17.08 o
   6   6   8    807.28    862.72     17.08 o
   0   7   8   6638.01   6412.63     19.95 o
   1   7   8   2391.47   2386.56     19.94 o
  -1   7   8   2221.01   2252.80     19.94 o
   2   7   8    944.20    945.29     17.08 o
  -2   7   8    839.34    848.51     17.08 o
   3   7   8    935.84    976.64     17.08 o
  -3   7   8    962.63    953.85     17.08 o
   4   7   8   4667.82   4626.89     19.94 o
  -4   7   8   4665.46   4757.95     19.94 o
   5   7   8   1375.72   1440.83     17.08 o
  -5   7   8   1319.78   1386.75     17.09 o
   0   8   8   2405.41   2346.76     31.33 o
   1   8   8   2019.40   2004.87     19.93 o
   2   8   8   1630.07   1697.19     19.93 o
   3   8   8   3464.61   3475.17     19.94 o
   0   1   9   2274.80   2309.79     25.63 o
   1   1   9   1552.55   1674.44     22.78 o
   0   2   9   1213.51   1147.55     22.78 o
   1   2   9   9117.64   9098.94     25.66 o
  -1   2   9   8838.28   8569.19     25.66 o
   2   2   9   1878.27   1865.34     19.93 o
   0   3   9    112.60    113.88     19.93 o
   1   3   9   4539.61   4572.84     22.79 o
  -1   3   9   4434.46   4550.17     22.79 o
   2   3   9   6318.08   6087.88     22.80 o
  -2   3   9   6437.84   6341.35     22.80 o
   3   3   9   3720.70   3677.70     22.79 o
   0   4   9     17.33     31.32     19.93 <
   1   4   9   2120.75   2130.26     19.94 o
  -1   4   9   2145.75   2167.27     19.94 o
   2   4   9   1035.89   1027.90     19.93 o
  -2   4   9   1012.23   1013.67     17.08 o
   3   4   9    218.29    230.60     17.08 o
  -3   4   9    198.03    207.83     17.08 o
   4   4   9      8.71     71.17     17.08 o
   0   5   9   5139.97   5020.60     19.95 o
   1   5   9    137.58    176.51     19.93 o
  -1   5   9    109.99    142.35     17.08 o
   2   5   9   3451.97   3463.81     19.94 o
  -2   5   9   3422.96   3452.44     17.09 o
   3   5   9   1172.22   1181.69     17.08 o
  -3   5   9   1192.79   1187.38     17.08 o
   4   5   9   2640.28   2537.69     17.09 o
  -4   5   9   2661.09   2603.19     17.09 o
   5   5   9    477.45    543.80     17.08 o
   0   6   9      2.60     11.39     17.08 <
   1   6   9   3477.32   3466.65     19.94 o
  -1   6   9   3462.38   3580.60     19.94 o
   2   6   9   3183.16   3101.93     19.94 o
  -2   6   9   3248.70   3230.06     19.94 o
   3   6   9   3414.68   3335.69     19.94 o
  -3   6   9   3590.37   3589.07     19.94 o
   4   6   9    133.26    133.81     17.08 o
  -4   6   9    176.65    162.27     17.08 o
   5   6   9    894.52    734.59     56.95 o
  -5   6   9    837.16    822.87     74.03 o
   0   7   9    243.04    276.16     17.08 o
   1   7   9   2210.93   2181.48     19.94 o
  -1   7   9   2164.64   2218.53     19.94 o
   2   7   9   1270.53   1349.68     19.93 o
  -2   7   9   1195.14   1252.89     17.08 o
   3   7   9   1768.91   1774.14     19.93 o
  -3   7   9   1820.83   1890.87     19.93 o
   0   1  10   1449.63   1494.99     22.78 o
   1   1  10    566.26    529.57     19.93 o
   0   2  10    231.64    256.23     19.93 o
   1   2  10   7162.20   7319.51     22.80 o
  -1   2  10   7006.74   7023.34     25.65 o
   2   2  10   4256.06   4398.76     19.94 o
   0   3  10    148.68    176.51     19.93 o
   1   3  10   1202.51   1261.44     19.93 o
  -1   3  10   1256.42   1278.51     19.93 o
   2   3  10   2472.42   2440.81     19.94 o
  -2   3  10   2518.27   2560.40     19.94 o
   3   3  10   1939.88   1933.66     19.93 o
   0   4  10     61.66     82.56     19.93 o
   1   4  10   1076.04   1193.07     19.93 o
  -1   4  10   1130.36   1141.80     19.93 o
   2   4  10    943.59    962.40     19.93 o
  -2   4  10    983.03   1033.58     17.08 o
   3   4  10    332.85    361.57     19.93 o
  -3   4  10    239.65    267.62     17.08 o
   4   4  10    304.36    338.80     17.08 o
   0   5  10   1885.48   1979.20     19.93 o
   1   5  10    293.26    355.88     19.93 o
  -1   5  10    329.15    324.56     17.08 o
   2   5  10   5495.30   5430.94     19.95 o
  -2   5  10   5373.94   5342.76     19.95 o
   3   5  10    726.11    771.59     19.93 o
  -3   5  10    650.96    717.50     17.08 o
   4   5  10   1021.38   1104.76     17.08 o
  -4   5  10    956.88   1062.07     17.08 o
   0   6  10   1235.52   1332.61     19.93 o
   1   6  10   2663.17   2751.31     19.94 o
  -1   6  10   2700.70   2802.55     19.94 o
   2   6  10   1312.00   1304.15     19.93 o
  -2   6  10   1312.06   1287.07     19.93 o
   0   1  11   4473.71   4700.84     22.79 o
   1   1  11    922.86   1005.10     19.93 o
   0   2  11   1951.25   1990.61     19.93 o
   1   2  11    444.14    512.47     19.93 o
  -1   2  11    422.08    446.99     19.93 o
   2   2  11      0.17     14.23     19.93 <
   0   3  11   2521.58   2654.39     19.94 o
   1   3  11    322.18    344.49     19.93 o
  -1   3  11    346.87    344.49     19.93 o
   2   3  11   1413.50   1492.12     19.93 o
  -2   3  11   1456.20   1554.75     19.93 o
   3   3  11     27.62     51.24     17.08 <
   0   4  11    782.08    916.81     19.93 o
   1   4  11   3068.78   3232.91     22.79 o
  -1   4  11   3188.25   3392.33     19.94 o
   2   4  11    738.54    757.36     19.93 o
  -2   4  11    742.07    768.75     19.93 o

loop_
 _twin_refln_datum_id
 _twin_refln_individual_id
 _twin_refln_index_h
 _twin_refln_index_k
 _twin_refln_index_l
 _twin_refln_F_squared_calc
 _twin_refln_F_squared_meas
 _twin_refln_F_squared_sigma
 _twin_refln_include_status
 ? ? ? ? ? ? ? ? ?
